1 **Epistasis mediated alleviation of the cost of antibiotic resistance for MRSA.**

2

3 Maho Yokoyama<sup>1</sup>, Maisem Laabei<sup>1</sup>, Emily Stevens<sup>1</sup>, Sion Bayliss<sup>1</sup>, Nicola Ooi<sup>2</sup>, Alex  
4 O'Neill<sup>2</sup>, Ewan Murray<sup>3</sup>, Paul Williams<sup>3</sup>, Anneke Lubben<sup>4</sup>, Shaun Reeksting<sup>4</sup>,  
5 Guillaume Meric<sup>1</sup>, Ben Pascoe<sup>1</sup>, Samuel K. Sheppard<sup>1</sup>, Mario Recker<sup>5</sup>, Laurence D.  
6 Hurst<sup>1</sup>, and Ruth C. Massey<sup>1,6\*</sup>

7

8 1: Milner Centre for Evolution, Dept. of Biology and Biochemistry, University of Bath,  
9 UK.

10 2: Antimicrobial Research Centre, Faculty of Biological Sciences, University of Leeds,  
11 Leeds, LS2 9JT, UK.

12 3: Centre for Biomolecular Sciences, University of Nottingham, NG7 2RD, UK.

13 4: Chemical Characterisation and Analysis Facility, Faculty of Science, University of  
14 Bath, BA2 7AY.

15 5: College of Engineering, Mathematics and Physical Sciences, University of Exeter,  
16 EX4 4QF, UK.

17 6: School of Cellular and Molecular Medicine, University of Bristol, UK.

18

19 \* for correspondence: [ruth.massey@bristol.ac.uk](mailto:ruth.massey@bristol.ac.uk)

20

21

1 **ABSTRACT**

2 Understanding how multi-drug resistant pathogens evolve is key to identifying  
3 means of curtailing their further emergence. Theoretically, antibiotic resistance  
4 incurs a fitness cost to bacteria, however, the scale of this have been found to vary  
5 widely, with some resistance mechanisms reported to have little or no cost. One  
6 such apparently cost-free resistance mechanism acquired by the major human  
7 pathogen *Staphylococcus aureus* is to the clinically important antibiotic mupirocin,  
8 which is mediated by mutation of the isoleucyl-tRNA synthetase gene. In a recent  
9 GWAS study we reported that this mutation is associated with changes in the  
10 virulence of the bacteria, with the data suggesting this is driven through epistatic  
11 interactions with other loci. Here we report that in a subsequent geographically  
12 distinct collection of MRSA of the USA300 lineage we have found the same epistatic  
13 signal. We demonstrate that this resistance mutation reduces the expression of *S.*  
14 *aureus* toxins, which alleviates the costs associated with mupirocin resistance and  
15 explains the apparent lack of effect on fitness reported previously. Given the  
16 potential effect the mutation could have on enzyme activity and the subsequent  
17 translation of proteins containing high levels of isoleucine, we quantified the  
18 prevalence of isoleucine across all coding regions of the *S. aureus* genome. This  
19 identified key proteins of the toxin regulating Agr quorum sensing system, as well as  
20 four of the PSM family of toxins as having above average isoleucine content. For one  
21 of these proteins, AgrC, we found that shortly after induction there is a two-fold  
22 difference in the ability of the mupirocin resistant strain to translate the protein. We  
23 also found there to be significantly more free isoleucine in the cytoplasm of the  
24 mutant, suggesting it is not being incorporated into proteins at the same rate as the  
25 wild type strain. Although the effect of the mutation on AgrC translation was only  
26 temporary, we believe this delay in activation may have an effect on toxin  
27 expression, which in combination with the reduction in the expression of the PSMs  
28 may explain the effect on toxicity in the mupirocin resistant strain. This concomitant  
29 compensation of antibiotic resistance by offsetting the energetically-costly  
30 production of toxins through epistasis may help explain the rapid and successful  
31 emergence of this problematic antibiotic resistant pathogen.

32

## 1 INTRODUCTION

2 Antibiotic resistance can evolve in many ways, and frequently incurs a fitness cost to  
3 the organism<sup>1</sup> which has to either mutate the target site of the antibiotic, acquire  
4 and express a gene encoding an alternative non-susceptible version of the target  
5 protein, or acquire an efflux pump that removes the antibiotic before it can attack its  
6 target<sup>2</sup>. As antibiotics are most commonly used for short and defined periods of time,  
7 bacteria are under selection to reduce these costs to avoid displacement once  
8 treatment has finished. In many cases this is achieved through compensatory  
9 mutations which has resulted in many resistance mechanisms being maintained  
10 stably in the population for long periods of time<sup>3</sup>. However, some antibiotic  
11 resistance mechanisms have been reported to incur no detectable fitness costs<sup>4</sup>. This  
12 could be due to limitations in our abilities to replicate *in vivo* situations sufficiently *in*  
13 *vitro*, but it could also suggest that bacteria can ameliorate fitness costs without  
14 mutation, which would be distinctly advantageous over those mechanisms that rely  
15 on the stochasticity of acquiring a specific compensatory mutation to maintain  
16 competitive fitness.

17 *Staphylococcus aureus* is an example of a major human pathogen<sup>5</sup> that has  
18 become more challenging to treat due to the emergence of antibiotic resistance,  
19 with Methicillin-Resistant *S. aureus* (MRSA) being the most notable example<sup>6</sup>. This  
20 bacterium resides asymptotically as part of the normal nasal flora of up to 50% of  
21 humans<sup>7</sup>, however, this is a significant risk factor for infection<sup>8</sup>, to the extent that  
22 carriers are often decolonised using antibiotics such as mupirocin prior to invasive  
23 procedures such as surgery or dialysis<sup>9</sup>. Mupirocin is a polyketide antibiotic that is  
24 applied as an ointment to eradicate nasal carriage of MRSA in patients at risk of  
25 infection<sup>10</sup>. Such decolonisation has been reported to reduce *S. aureus* infections of  
26 post-surgical wounds by 58%, of haemodialysis patients by 80% and of peritoneal  
27 dialysis patients by 63%<sup>11</sup>.

28 The molecular target for mupirocin is the bacterial isoleucyl-tRNA synthetase  
29 (IleRS), which charges tRNAs with the amino acid isoleucine (Ile)<sup>10</sup>. By binding to this  
30 enzyme the antibiotic halts protein synthesis, so inhibiting bacterial growth<sup>12</sup>. As a  
31 consequence of the widespread use of mupirocin, resistance has emerged where the  
32 bacteria have mutated the gene encoding IleRS, *ileS*, resulting in an amino acid

1 substitution (V588F, encoded by a G to T single nucleotide polymorphism (SNP) at  
2 position 1,762 in the *ileS* gene) which alters the protein's structure and renders  
3 mupirocin less effective<sup>13</sup>. This confers a low to intermediate level of resistance to  
4 the antibiotic<sup>14</sup>. Alternatively, the bacteria acquire an alternative IleRS, encoded by a  
5 *mupA* or *mupB* gene, on a plasmid, which confers a higher level of resistance<sup>15,16</sup>.  
6 The prevalence of mupirocin resistance varies widely, with some reporting it to be as  
7 high as 80%<sup>17</sup>, the clinical relevance of which is that decolonisation is less  
8 successful<sup>18</sup> resulting in increasing rates of infection in high risk patients.

9         The *ileS* gene is highly conserved across the thousands of sequenced *S.*  
10 *aureus* isolates, and many failed attempts to inactivate it suggest its activity is  
11 essential to the bacteria. It is therefore surprising that the mutation that confers  
12 mupirocin resistance, by altering the structure of the encoded protein does not  
13 appear to affect fitness. However, in a recent genome wide association study  
14 (GWAS) on the major hospital acquired MRSA clone, ST239, this mutation was  
15 significantly associated with differences in the virulence of *S. aureus* isolates<sup>19</sup>. Its  
16 effect on toxin secretion (a major aspect of *S. aureus* virulence) was believed to  
17 result from epistatic interactions between *ileS* and other polymorphic loci. That is,  
18 when the isolates were split into those with and without the mupirocin resistance  
19 conferring mutation in *ileS* (from here on referred to as mup<sup>R</sup> IleRS), no significant  
20 difference in toxicity was detected. However, when the isolates were further  
21 stratified into those with and without the mup<sup>R</sup> IleRS, alongside those with and  
22 without other polymorphic loci, significant differences in toxicity were observed with  
23 combinations of specific loci, suggesting that these loci interact with *ileS* in an  
24 epistatic manner to affect toxin production<sup>19</sup>.

25         As isoleucine is a highly hydrophobic amino acid we would expect it to be  
26 prevalent in membrane embedded proteins. Such proteins play key roles in both the  
27 sensing of the environment to signal to the bacteria when to express toxin genes<sup>20,21</sup>,  
28 but also in the destructive nature of the toxins that embed themselves in the  
29 membrane of host cells<sup>22</sup>. Toxin production is an energetically expensive activity  
30 which is often selected against during *S. aureus* infection, and as such we  
31 hypothesised that the emergence and success of the mupirocin resistance conferring  
32 mutation in the *ileS* gene is due in part to it reducing toxin expression through

1 epistatic interactions with proteins containing high levels of isoleucine. Here we have  
2 characterised the fitness and toxicity affecting epistatic effects of the  $mup^R$  IleRS,  
3 and suggest our findings may explain the successful emergence of this notorious  
4 antibiotic resistant pathogen.

5

## 6 **RESULTS and DISCUSSION**

### 7 **Epistasis between the mupirocin resistance conferring mutation in the *ileS* gene 8 and other loci is associated with the toxicity of the USA300 MRSA lineage.**

9 previous study, which focussed on the hospital associated ST239 lineage of MRSA,  
10 we found that epistasis between the mupirocin resistance conferring mutation in the  
11 *ileS* gene and other loci was associated with the toxicity of individual isolates<sup>19</sup>. In a  
12 subsequent GWAS study on a genetically and geographically distinct collection of  
13 MRSA that contained 134 isolates of the USA300 lineage, we identified polymorphic  
14 loci directly affecting toxicity<sup>23</sup>. To examine whether there were any epistatic  
15 interactions affecting toxicity in the USA300 collection we used PLINK, an open  
16 source GWAS platform<sup>24</sup>. Here we again found the same mupirocin resistance  
17 conferring mutation in the *ileS* gene as identified within the ST239 collection as the  
18 most dominant epistatically interacting locus (fig. 1), demonstrating the widespread  
19 nature of this effect across a diverse set of clonal lineages.

20

### 21 **The mupirocin resistance conferring mutation in the *ileS* gene affects bacterial**

22 **toxicity.** As our data is based on clinical isolates with many other polymorphic loci  
23 we aimed to functionally verify the effect of mupirocin resistance on toxicity. We  
24 isolated a  $mup^R$  verison of SH1000 by plating SH1000, a  $mup^S$  strain, on agar  
25 containing 4 $\mu$ g/ml mupirocin. The resulting  $mup^R$  colonies were subjected to whole  
26 genome sequencing to confirm the V588F mutation was present, and that no  
27 additional mutations in toxicity affecting loci had emerged; this strain was  
28 designated MY40. The toxicity of this mutant pair was quantified, where the wild  
29 type mupirocin sensitive parent strain killed 87% of the cells, whereas the mupirocin  
30 resistant mutant killed only 71% (two tailed t-test;  $p=0.023$ ). This confirmed the  
31 negative effect of mupirocin resistance on the ability of *S. aureus* to lyse human cells.

32

1 **Reducing the production of toxins alleviates the fitness cost of mup<sup>R</sup>.** The *ileS* gene  
2 is both highly conserved and essential to the bacteria, as such it is surprising that  
3 mutations that alter the encoded proteins structure does not have an apparent  
4 effect on the fitness of the resistant bacteria. As the production and secretion of  
5 toxins is an energetically costly activity, we hypothesized that the down regulatory  
6 effect of mupirocin resistance on toxin production may mask or alleviate the  
7 resistance related fitness costs that are incurred. To test this we quantified the  
8 relative fitness<sup>25</sup> of mup<sup>S</sup> and mup<sup>R</sup> strains by competition in two genetic  
9 backgrounds; one in a wild type background where the bacteria can express toxins,  
10 and one where the major regulator of toxin expression, the Agr quorum sensing  
11 system, has been inactivated such that neither competing strain can produce toxins.  
12 As reported previously, in the wild type background with the functional Agr system,  
13 there was no difference in fitness between mup<sup>S</sup> and mup<sup>R</sup> strains, where the  
14 Malthusian parameters of the mup<sup>S</sup> and mup<sup>R</sup> strains were 14.9 and 14.8  
15 respectively (two-tailed test p=0.6). However, when we quantified the relative  
16 fitness in the Agr defective background where neither strain could produce toxins,  
17 and so any alleviation of fitness that may result from the reduction of toxicity by the  
18 mup<sup>R</sup> mutation was nullified, we found the fitness of the mup<sup>R</sup> strain to be  
19 significantly lower than the mup<sup>S</sup> strain, where the Malthusian parameters of the  
20 mup<sup>S</sup> and mup<sup>R</sup> strains were 15.0 and 14.4 respectively (two-tailed t-test; p=0.02).  
21 This demonstrates that this mutation can affect fitness, and that the alleviation of  
22 this burden by reducing toxin production which may explain the widespread success  
23 of this resistance mechanism.

24

25 **Identification of proteins affecting toxicity via epistasis.** To understand the  
26 mechanistic basis of how epistasis between mup<sup>R</sup> IleRS and the other loci affects  
27 toxicity we compared the list of loci identified as interacting with mup<sup>R</sup> IleRS for both  
28 the ST239 and USA300 collections (Table 1), however no known effectors of toxicity  
29 were identified amongst either collection. As GWAS is notorious for producing false  
30 positive associations, we hypothesised this may be hindering the use of this  
31 approach to identify plausible candidate loci that interact with *ileS* to affect  
32 toxicity. As such we focussed instead on the inherent activity of IleRS, which is to

1 charge tRNA with isoleucine for incorporation into proteins, and argued that  
2 mutation of IleRS would have the greatest effect on proteins with the highest  
3 proportions of Ile. We therefore quantified the Ile content for each protein encoded  
4 across the *S. aureus* genome to which we fitted a regression model (after a Box-Cox  
5 power transformation) and then identified those proteins that fell outside the 95%  
6 prediction interval (fig. 3, Supp Table 1). Amongst these high Ile containing proteins  
7 are AgrB and AgrC at 18 and 17% respectively, the two membrane bound  
8 components of the Agr toxicity regulating, quorum sensing system. We also  
9 identified four known membrane damaging toxins: delta, PSM $\alpha$ 1, PSM $\alpha$ 2 and  
10 PSM $\alpha$ 4 also contain exceptionally high levels of Ile (19.2% for delta, 28.6% for  
11 PSM $\alpha$ 1 and PSM $\alpha$ 2, and 40% for PSM $\alpha$ 4). Based on these findings we hypothesised  
12 that were the translation of these proteins affected by the mutation of IleRS, this  
13 could explain how such epistatic interactions could be affecting toxicity.

14

15 **The early translation of AgrC, a protein with high Ile content, is affected by**  
16 **mupirocin resistance.** Despite being the primary focus of many research groups for  
17 decades, natively produced AgrB and AgrC proteins have never been visualised using  
18 existing detection methods, such as western blotting. As such, the quantification of  
19 the translation of these proteins is reliant on developing alternative assays as proxies  
20 for their abundance. The *agrC* gene encodes the membrane bound component of  
21 the Agr system that detects and responds to extracellular AIP and transmits this  
22 information through phospho relay to AgrA, which is the cytoplasmic response  
23 regulator of the Agr system. To determine the effect of mup<sup>R</sup> IleRS on protein  
24 translation more directly, we engineered a *S. aureus* strain in which we could control  
25 the transcription of *agrC*, while simultaneously quantifying its translation (depicted  
26 in fig. 3). To achieve this, the *agr* locus in SH1000 was deleted and then partially  
27 replaced with a plasmid containing the *agrC* and *agrA* gene, where the *agrC* gene  
28 was engineered to encode a 6X his-tag at the C terminus to facilitate protein  
29 quantification using anti-his tag antibodies. This created MY42 (mup<sup>S</sup>) and MY43  
30 (mup<sup>R</sup>), which have closed systems in which the rate of the response of the bacteria  
31 to the addition of exogenous AIP at both a transcriptional and translational level can  
32 be accurately controlled and monitored.

1 Overnight cultures of MY42 and MY43 were diluted into fresh media and after 2h of  
2 growth 100nM of synthetic AIP-1 was added. After an hour of incubation the mRNA  
3 and whole cell proteins were extracted. Using qRT-PCR on the mRNA samples we  
4 detected no difference in the transcription of the *agrC* gene between the  $\text{mup}^{\text{R}}$  and  
5  $\text{mup}^{\text{S}}$  strains, which was unsurprising given that they were induced with the same  
6 quantities of AIP for the same period of time (Table 2). However, when we compared  
7 the translation of the AgrC protein there was on average twice as much protein in  
8 the extraction from the  $\text{mup}^{\text{S}}$  strain when compared to that from the  $\text{mup}^{\text{R}}$  strain  
9 (Table 2), where a representative western blot can be seen in figure 4. This suggests  
10 that in the mupirocin resistant strain, proteins containing high levels of Ile such as  
11 AgrC, are translated less efficiently, despite equivalent amount of mRNA being  
12 available for translation.

13

14 **The cytoplasm of mupirocin resistant *S. aureus* contains more free Ile.** As our data  
15 suggests that the  $\text{mup}^{\text{R}}$  IleRS may affect the efficiency of incorporation of Ile into  
16 proteins, we hypothesised that there may be a detectable difference in the quantity  
17 of free Ile present in the cytoplasm of  $\text{mup}^{\text{R}}$  and  $\text{mup}^{\text{S}}$  strains. To test this we lysed  
18 overnight cultures of the isogenic  $\text{mup}^{\text{R}}$  and  $\text{mup}^{\text{S}}$  strains SH1000 and MY40, and  
19 quantified the free Ile present in their cytoplasm by LC-MS/MS. On average the  
20 mupirocin resistant strains had 5.5 $\mu\text{g}/\text{ml}$  of Ile in their cytoplasm, whereas the  
21 mupirocin sensitive strains only had 5.2  $\mu\text{g}/\text{ml}$  (one-tailed T-test;  $p=0.03$ ), providing  
22 further support for our hypothesis that mupirocin resistance affects the activity of  
23 IleRS.

24

25 **The effect of mupirocin resistance on Agr activity is temporal.** An alternative means  
26 of quantifying Agr activity is to monitor the transcription of the regulatory RNA  
27 molecules, which is responsible for the major phenotypic changes associated with  
28 this system, RNAIII. By utilising a lux fusion to the RNAIII promoter P3, we were able  
29 to monitor both the response of the system to increasing quantities of AIP, and also  
30 monitor its activity over time. The sensitivity of this system is such that activation of  
31 the Agr system is only detectable from 2hr post induction onwards. Using this  
32 experimental system we found no difference in the Agr activity between the  $\text{mup}^{\text{S}}$



1 and mup<sup>R</sup> strains (fig. 5), suggesting any early effects of the mupirocin resistance  
2 mutation on AgrC translation is short lived.

3

#### 4 **Protein A, alpha toxin and PSMs production are affected by mupirocin resistance.**

5 As the effect of the mupirocin resistance mutation on Agr seems to be short lived,  
6 we wanted to quantify its effect on Agr regulated genes. We therefore compared the  
7 level of PSMs produced by the mup<sup>S</sup> and mup<sup>R</sup> strains, and demonstrate that the  
8 expression of these Agr regulated toxins was affected by mupirocin resistance (fig. 6),  
9 although as four of these proteins contain high levels of Ile, we cannot verify at this  
10 stage if the effect on their production is at the transcription or translation stage. We  
11 also compared the expression of alpha toxin and Protein A, and found that as would  
12 be expected were the Agr activity of the system repressed, that alpha toxin  
13 expression is lower (2.12 fold, p=0.02) while Protein A is higher (27 fold, p<0.001) in  
14 the mup<sup>R</sup> strain, a representative western is provided in fig. 6.

15

#### 16 **Conclusion**

17 The application of GWAS to understand bacterial phenotypes is growing in  
18 popularity, but it is notorious for producing false positive associations, which is  
19 further compounded by the effects of population structure and linkage  
20 disequilibrium. For this reason, it was not until we confirmed previously identified  
21 virulence-affecting, epistatic interactions in a second, genetically and geographically  
22 distinct collection of *S. aureus* that we began characterising its mechanistic basis. In  
23 doing so we have demonstrated that mupirocin resistance reduces the toxicity of *S.*  
24 *aureus*, an effect we believe it mediated through slowing of the translation of  
25 proteins containing high levels of isoleucine, such as those of the toxicity regulating  
26 Agr system. This reduction in toxin expression appears to alleviate the fitness costs  
27 associated with this antibiotic resistance mechanism, which may provide a explaining  
28 the successful emerges of this problematic pathogen, as toxin expression or are  
29 often switched off by mutation during infection<sup>23</sup>.

30

31

## 1 MATERIALS AND METHODS

### 2 Strains and growth conditions

3 All strains used in this study are listed in Table 2. *S. aureus* strains were grown at  
4 37°C, in either tryptic soy agar or broth (TSA/TSB) with the appropriate antibiotic  
5 where necessary. The *E. coli* TOP10 strain containing the pAgrC(his)A plasmid was  
6 grown in Luria-Bertani (LB) media with 100µg/ml ampicillin. THP-1 cells were grown  
7 in RPMI 1640 supplemented with foetal bovine serum (10%), L-glutamine (2mM),  
8 penicillin (100 units/ml) and streptomycin (100µg/ml) and incubated at 37°C with 5%  
9 CO<sub>2</sub>.

10

### 11 Selection of the mupirocin resistant strain.

12 As an essential gene *ileS* cannot be inactivated, and as a consequence a homologous  
13 recombination based mutational approach were unsuccessful. Therefore, to  
14 generate isogenic mupirocin resistant and sensitive strains we utilised a selection  
15 based method where an overnight culture of a mupirocin sensitive strain (e.g  
16 SH1000 (derivative of NCTC 8325, NCBI accession: NC\_007795.1)) was plated onto  
17 agar plates with 4µg/ml mupirocin. This was incubated at 37°C for 48 hr and colonies  
18 that grew were further isolated by streaking onto fresh mupirocin plates.

19

### 20 Genome sequencing of the mup<sup>R</sup> strain.

21 *S. aureus* strain MY40 was sequenced in this study; DNA was extracted using the  
22 QIAamp DNA Mini Kit (QIAGEN, Crawley, UK), using manufacturer's instructions with  
23 1.5 µg/µL lysostaphin (Ambi Products LLC, NY, USA) to facilitate cell lysis. DNA was  
24 quantified using a Nanodrop spectrophotometer, as well as the Quant-iT DNA Assay  
25 Kit (Life Technologies, Paisley, UK) before sequencing. High-throughput genome  
26 sequencing was performed using a MiSeq machine (Illumina, San Diego, CA, USA)  
27 and the short read, paired-end data was assembled using the *de novo* assembly  
28 algorithm SPAdes (Bankevich et al (SPADES). Sequence data are archived in the NCBI  
29 repositories: GenBank Accession: SUB2754769, Short Read Archive (SRA):  
30 SRR5651527, associated with BioProject: PRJNA384009. Assembled genomes are  
31 also available on FigShare ([doi.org/10.6084/m9.figshare.5089939.v1](https://doi.org/10.6084/m9.figshare.5089939.v1)).

32

## 1 Toxicity assays

2 THP-1 cells<sup>26</sup> were grown as described above and harvested by centrifugation and  
3 washed in PBS and diluted to a final density (determined by haemocytometer) of  
4  $2 \times 10^6$  cells per ml of PBS. Bacterial supernatant was harvested after 18hrs of growth  
5 in TSB at 37°C. 20µl of the bacterial supernatant was mixed with 20µl of THP-1 cells,  
6 and incubated for 12 mins at 37°C. 260µl of Guava ViaCount (Milipore) was added to  
7 the sample, and incubated at room temperature for 5 mins before analysing the  
8 viability on the Guava flow cytometer (Milipore).

9

## 10 Competition assay.

11 Two pairs of strains, SH1000 and MY40 ( $mup^S$  and  $mup^R$ , both Agr positive), and  
12 MY18 and MY41 ( $mup^S$  and  $mup^R$ , both Agr negative), were co-cultured to see if  
13 there was a fitness cost associated with  $mup^R$ . The strains were cultured individually  
14 overnight and diluted to  $10^4$  cfu/ml. 25µl of each diluted culture was added into 5ml  
15 fresh broth, and grown at 37°C with shaking for 24h. The mixed culture was diluted  
16 and plated onto agar plates with and without 4µg/ml mupirocin and incubated at  
17 37°C. The resulting colonies were counted, and the number of colonies from the  
18 mupirocin plate was subtracted from the count from no antibiotic plate. The  
19 Malthusian parameter was calculated using the following formula:

20  $\ln(\text{final density (colony forming units (CFU)/ml)} / \text{starting density (CFU/ml)})$

21 The Malthusian parameters of the  $mup^S$  and  $mup^R$  strains were compared using a t-  
22 test.

23

## 24 Deletion of the Agr locus from SH1000.

25 Phage transduction was used to construct the  $mup^R$  and  $mup^S$  Agr mutants. In the *S.*  
26 *aureus* strain ROJ48, the entire Agr locus has been replaced with an erythromycin  
27 resistance cassette and a P3-lux system<sup>27</sup>. This was moved from ROJ48 into SH1000  
28 by phage transduction as follows: ROJ48 φ11 lysates were prepared from 200µl of  
29 overnight ROJ48 culture in LK (1% Tryptone, 0.5% yeast extract, 1.6% KCl) which was  
30 added to 3ml of fresh LK and 3ml of phage buffer (10mM MgSO<sub>4</sub>, 4mM CaCl<sub>2</sub>, 50mM  
31 Tris-HCl pH 7.8, 100mM NaCl and 0.1% gelatine powder in molecular/MiliQ water),  
32 and to this 500µl φ11-RN6390B lysate was added. This was incubated at 30°C

1 shaking until the media became clear, which indicated bacterial lysis. The lysates  
2 were then filter sterilised, and a second round of lysis was carried out on ROJ48 with  
3 this first round lysate. After these two lysis steps, transduction into SH1000 strains  
4 was performed by adding 200µl of overnight culture to 1.8ml LK with 10µl 1M CaCl<sub>2</sub>,  
5 and 500µl the φ11-ROJ48 lysate. This was incubated at 37°C with shaking for 45 min,  
6 then 1ml ice cold 20mM trisodium citrate was added and the transducing mixture  
7 was placed on ice for 5 min. The bacteria were harvested by centrifugation and re-  
8 suspended with 1ml ice cold 20mM trisodium citrate. This was incubated on ice for  
9 2.5h, and plated onto TSA plates with 20mM trisodium citrate, erythromycin and  
10 lincomycin (25µg/ml) which was incubated overnight at 37°C.

11

## 12 **AIP EC50 and AIP quantification assays**

13 These assays were performed as described previously<sup>27</sup>. Strains were grown  
14 overnight in Brain Heart Infusion (BHI), and 1ml of the overnight was washed 3 times  
15 with PBS. The pellet was re-suspended in fresh BHI and grown for a further 2h. A  
16 dilution series of AIP-1 was created, with concentrations ranging from 250nM to  
17 0.125nM in 1:2 dilutions, plus 1250nM and 2500nM. 190µl of the culture was  
18 pipetted into a black 96-well plate, and 10µl of this dilutions series were also  
19 pipetted into the wells. The OD<sub>600</sub> and luminescence readings were carried out every  
20 15 min.s for 80 cycles in a Tecan plate reader. For the AIP quantification strains were  
21 grown in BHI, with chloramphenicol (10µg/ml). The reporter strain was diluted 1/20  
22 into fresh BHI and grown for a futher 2h, while the supernatants of the mupS and  
23 mupR strains (SH1000, MY40, MY18 and MY41) were filtered through a 0.22µm filter.  
24 The reporter strain was diluted 1/50 and pipetted into a black 96-well plate. The  
25 supernatant was added to the wells at 5% final concentration, and the OD<sub>600</sub> and  
26 luminescence readings were carried out every 15 mins for 80 cycles in a Tecan plate  
27 reader.

28

## 29 **Construction of pAgrC(his)A (with his-tag)**

30 The His tagged agrC vector was constructed by Site-Directed Mutagenesis of the  
31 plasmid pAgrCA<sup>27</sup> based on the Stratagene Quick change methodology using primer  
32 pair EJM 84 (5' CAAAAGTTGAAATTATTAACAAC **CACCATCACCATCATCAC**

1 TAGCCATAAGGATGTGAATGTATG (His tag and new stop codon in **bold**) and EJM85  
2 (5' GTGGTTGTTAATAATTTCAACTTTTTGAATAAAGAAACC ATTTTCGATAATTG).

3

#### 4 **Transformation of pAgrC(his)A into the Agr knock out strains.**

5 pAgrC(his)A was extracted from *E. coli* TOP10. First, this plasmid was electroporated  
6 into RN4220; briefly, RN4220 was grown overnight in Brain Heart Infusion (BHI)  
7 medium, and diluted 1:500 into 10ml fresh BHI. This was then incubated at 37°C with  
8 shaking until OD<sub>600</sub> 0.4-0.6. The culture was then cooled, before centrifuging at  
9 5,000rpm for 10 min at 4°C. The media was discarded, and the pellet was re-  
10 suspended with 5ml ice cold 500mM sucrose. This was then re-centrifuged,  
11 supernatant discarded then 5ml ice cold 500mM sucrose added to the pellet. This  
12 above process was repeated 2 more times for a total of 3 sucrose washes, and  
13 centrifuged as above. After discarding the supernatant, 500µl ice cold 500mM  
14 sucrose was added to the pellet and re-suspended. This was left on ice for 30 min,  
15 before centrifuging and re-suspending in 100µl ice cold 500mM sucrose. The cells  
16 were pipetted into an electroporation cuvette, and 5-10µl pAgrC(his)A was added.  
17 This was then electroporated using the StA setting on MicroPulser (Bio-Rad), and  
18 then recovered in 750µl BHI at 37°C for 1h. 200µl of the transformed material was  
19 plated onto TSA plates with chloramphenicol, and incubated overnight at 37°C. The  
20 plasmid was extracted from the transformed RN4220, and electroporated into the  
21 agr knock out strains to yield MY42 (mup<sup>S</sup>) and MY43 (mup<sup>R</sup>).

22

#### 23 **qRT-PCR**

24 Overnight cultures of MY42 and MY43 were diluted 1:500 into 3ml fresh TSB-  
25 chloramphenicol. This was grown for 2h, and induced with 100nM AIP-1 for 1h. 2ml  
26 of these cultures were mixed with 4ml RNA Protect Bacteria (Qiagen), and the  
27 RNeasy Mini Kit (Qiagen) was used to extract RNA following the manufacturer's  
28 protocol. Lysostaphin (200µg/ml) was added to Tris-EDTA buffer (Ambion), and this  
29 was added to the sample after the RNA Protect step before continuing with the  
30 protocol. When the RNA was extracted, Turbo DNA-free kit (Thermo) was used to  
31 remove genomic DNA from the RNA samples; 3µl Turbo DNase was added to the  
32 sample and incubated for 1.5h at 37°C, then a further 4µl Turbo DNase was added and

1 incubated for 1.5h. 35µl DNase inactivation reagent was added to the samples to  
2 inactivate the DNase according to the protocol. The concentration of RNA in the  
3 samples were measured using Qubit RNA Broad Range kit (Thermo) and normalised  
4 before using QuantiTect Reverse Transcription Kit (Qiagen) to convert the RNA  
5 samples into cDNA according to the manufacturer's protocol. After adding the  
6 reverse transcriptase, the samples were incubated at 42°C for 20 min before raising  
7 the temperature to 95°C for 3 mins to inactivate the reverse transcriptase. Primers  
8 for *gyrB*, a housekeeping gene, was used alongside those for *agrC* to standardise  
9 transcript levels (*gyrB* forward: CCAGGTAAATTAGCCGATTGC, *gyrB* reverse:  
10 AAATCGCCTGCGTTCTAGAG. *agrC* forward: GCAGATTATTCTATACTGTGCTAAC, *agrC*  
11 reverse: ACTACAAAAAGCTAGGGAATATTACAAA). ssoAdvanced SYBR Green  
12 Supermix (Bio-Rad) was used, using a standard curve of known genomic DNA  
13 concentrations for each primer set. 5µl of samples, standards and water were  
14 pipetted into the wells of a 96-well PCR plate. The supermix was added to water and  
15 primers according to the manufacturer's protocol, and 15µl of this mix was pipetted  
16 over the DNA samples. This was then placed into a qPCR machine, and run using the  
17 manufacturer's recommendation. The quantity of *agrC* or RNA III cDNA was divided  
18 by the quantity of *gyrB* cDNA to get a ratio of *agrC* transcription levels.

19  
20 An overnight culture of SH1000 and MY40 was diluted 1:1000 into 50ml fresh TSB,  
21 and grown for 18h. The cultures were centrifuged at 18,000 rpm for 10 min.s, and  
22 35ml of the supernatant was mixed with 10ml butanol. The samples were incubated  
23 at 37°C shaking for 3h, and were then centrifuged at 3,000 rpm for 3 min and 1ml of  
24 the upper organic layer was taken off. The samples were then freeze-dried overnight  
25 and then re-suspended in 160µl 8M urea.

26  
27 **Western blots.** To quantify AgrC translation overnight cultures of MY42 and MY43  
28 were diluted 1:500 into 30ml fresh TSB. This was grown for 2h, and induced with AIP  
29 for 1h as above. The cells were pelleted and washed three times with phosphate  
30 buffered saline (PBS) (Oxoid). The pellet was re-suspended in 100µl PBS and  
31 lysostapin (200µg/ml), DNase I (20µg/ml) and RNase A (10µg/ml) was added to the  
32 cells, and incubated at 37°C for 1h. The samples were then sonicated briefly on ice,

1 and the lysate was mixed with 100µl PBS with 0.2% Triton X-100. Western was  
2 carried out using HisProbe HPR Conjugate (Thermo). The total protein concentration  
3 of two samples from each time point were equalised using Bradford Reagent (Sigma).  
4 8µl of these samples were mixed with 8µl Morris SDS-PAGE sample buffer. The  
5 samples were then incubated at 60°C for 2 min, before loading 15µl into 12%  
6 acrylamide gels. 5µl pre-stained protein ladder was added to a free well, and the gel  
7 was run at 200V for 1h. The proteins from the gel were transferred onto  
8 nitrocellulose membrane by wet transfer (400mA for 1h) and blocked in 50ml 5%  
9 skimmed milk for 1h on a shaking platform or 4°C overnight. It was then washed 4  
10 times with 15ml TBS-T (25mM Tris-HCl, 150mM NaCl (pH7.2), 0.05% Tween 20) on a  
11 shaking platform for 10 min each. The membrane was then incubated with HisProbe  
12 working solution (1 part TBS (10mM Tris-HCl and 150mM NaCl (pH7.4)), 3 parts  
13 above TBS-T, 1:2000 HisProbe (4mg/ml), 1% Bovine Serum Albumin (Sigma)) for 1h  
14 on a shaking platform. The above wash process was then used twice, and the  
15 membrane was then placed onto SuperSignal West Pico Chemiluminescent  
16 Substrate (Thermo) working solution for 5 min before visualising. Densitometry using  
17 ImageJ was carried out to quantify the intensity of the bands.

18

19 To visualise  $\alpha$ -toxin and protein A, a Western blot was carried out as follows: SH1000  
20 (mupS) and MY40 (mupR) were grown for 18h in 15ml TSB, and the cells were  
21 pelleted by centrifugation at full speed for 10 min.s. Trichloroacetic acid was added  
22 to the supernatant to a final concentration of 20%, and the samples were incubated  
23 on ice for 1h. The samples were then centrifuged at full speed for 20 min.s at 4°C,  
24 and the supernatant discarded. 300µl cold acetone was added to the samples to  
25 dissolve the pellet, and then centrifuged again for 20 min.s at 4°C. This acetone step  
26 was repeated two more times, and then the pellet was re-suspended in 80µl 8M  
27 Urea and 0.5µl 1M NaOH. The samples were quantified, equalised, then mixed with  
28 Morris SDS-PAGE buffer as above, and incubated at 95°C for 5 min.s. before loading  
29 onto a 12% acrylamide gels as above. The gels were run at 120V for 1.5h, and the  
30 proteins were transferred onto nitrocellulose as above.

31

1 For the  $\alpha$ -toxin Western; the membrane was blocked in 5% skimmed milk at 4°C  
2 overnight and then washed 5x with PBS. It was incubated with rabbit anti  $\alpha$ -toxin  
3 antiserum (1:3000 in PBS) for for 2h on a shaking platform, and washed 5x in PBS.  
4 Protein G-HRP Conjugate (1:1000 PBS) (Invitrogen) was added to the membrane, and  
5 incubated on a shaking platform for 1h. This was then visualised using the Opti-4CN  
6 Substrate Kit (BioRad) according to the manufacturer's guidelines.

7  
8 For the protein A Western; the membrane was blocked in 5% skimmed milk for 1h  
9 on a shaking platform, and washed 5x with PBS. This was then incubated with the  
10 anti-protein A-HRP Conjugate (1:5000 in PBS) (Abcam) for 1h. The membrane was  
11 washed 5 times with PBS and visualised using the SuperSignal West Pico  
12 Chemiluminescent Substrate as before.

#### 13 14 **Cytoplasmic preps and LC-MS/MS quantification of isoleucine**

15 5ml cultures of SH1000 and MY40 were grow for 18h. The cultures were then  
16 washed 3 times with 1ml sterile saline, centrifuging at 14,000rpm for 10 min after  
17 each wash. The pellet was then re-suspended in 500 $\mu$ l sterile saline, and 200 $\mu$ g/ml  
18 lysostaphin, 10 $\mu$ g/ml RNase A and 20 $\mu$ g/ml DNase I was added. This was then  
19 incubated at 37°C for 1h, and sonicated briefly on ice. The samples were then  
20 centrifuged at 14,000rpm for 10 min, and 500 $\mu$ l of the resulting supernatant was  
21 applied to a Vivaspin 500 (3,000 NWCO) protein concentrator (GE Healthcare). This  
22 was then centrifuged at 15,000g for 30 min. The samples were analysed using Liquid  
23 Chromatography-mass spectrometry (LC-MS), similar to the protocol by Sowell et  
24 al<sup>28</sup>. This was carried out using a MaXis HD quadrupole electrospray time-of-flight  
25 (ESI-QTOF) mass spectrometer (Bruker Daltonik GmbH, Bremen, Germany) operated  
26 in ESI positive-ion MS mode. The QTOF MS was coupled to an Ultimate 3000 UHPLC  
27 (Thermo Fisher Scientific, California, USA). The capillary voltage was set to 4500 V,  
28 nebulizing gas at 2 bar, drying gas at 10 L/min and 200°C. The TOF scan range was  
29 from 50 – 600 mass-to-charge ratio (m/z). Liquid chromatography separation was  
30 performed using an Acquity UPLC BEH C18, 1.7  $\mu$ M, 2.1 x 50 mm reverse phase  
31 column (Waters, Milford, MA, USA) with a flow rate of 0.3 mL/min at 30°C and an  
32 injection volume of 1  $\mu$ L. Mobile phases A and B consisted of 0.1 % v/v formic acid in



1 water, and 0.1 % v/v formic acid in acetonitrile, respectively. Gradient elution was  
2 carried out with 1 % mobile phase B until 2 min followed by a linear gradient to 95 %  
3 B at 4 min, holding at 95 % B until 6.5 min, and returning to 1 %B at 7 mins, with a  
4 total run time of 10 mins. The MS instrument was calibrated using a range of sodium  
5 formate clusters introduced by 10  $\mu$ L loop-injection prior to the chromatographic run.  
6 The mass calibrant solution consisted of 3 parts of 1 M NaOH to 97 parts of 50:50  
7 water:isopropanol with 0.2% formic acid. The observed mass and isotope pattern  
8 perfectly matched the corresponding theoretical values as calculated from the  
9 expected elemental formula. Isoleucine was detected as  $[M + H]^+$  and  $[M + Na]^+$  ions  
10 with a mass-to-charge ( $m/z$ ) ratio of 132.1019 and 154.0838 within 0.005 Da,  
11 respectively. Data processing was performed using the Data Analysis software  
12 version 4.3 (Bruker Daltonik GmbH, Bremen, Germany). Five DL-isoleucine standards  
13 were at different concentrations were made up in in 0.1% formic acid, and analysed  
14 before and after the samples for quantification purposes.  
15  
16

## 1 REFERENCES

- 2 1. Moura de Sousa, J., Balbontín, R., Durão, P. & Gordo, I. Multidrug-resistant  
3 bacteria compensate for the epistasis between resistances. *PLOS Biol.* **15**,  
4 e2001741 (2017).
- 5 2. Tenover, F. C. Mechanisms of Antimicrobial Resistance in Bacteria. *Am. J. Med.*  
6 **119**, S3–S10 (2006).
- 7 3. Levin, B. R., Perrot, V. & Walker, N. Compensatory mutations, antibiotic  
8 resistance and the population genetics of adaptive evolution in bacteria.  
9 *Genetics* **154**, 985–997 (2000).
- 10 4. Hurdle, J. G. The isoleucyl-tRNA synthetase mutation V588F conferring  
11 mupirocin resistance in glycopeptide-intermediate *Staphylococcus aureus* is  
12 not associated with a significant fitness burden. *J. Antimicrob. Chemother.* **53**,  
13 102–104 (2003).
- 14 5. Rasigade, J.-P. & Vandenesch, F. *Staphylococcus aureus*: a pathogen with still  
15 unresolved issues. *Infect. Genet. Evol.* **21**, 510–4 (2014).
- 16 6. Lowy, F. Antimicrobial resistance: the example of *Staphylococcus aureus*. *J.*  
17 *Clin. Invest.* **111**, 1265–1273 (2003).
- 18 7. Wertheim, H. F. *et al.* The role of nasal carriage in *Staphylococcus aureus*  
19 infections. *Lancet Infect. Dis.* **5**, 751–762 (2005).
- 20 8. Gordon, R. J. & Lowy, F. D. Pathogenesis of Methicillin-Resistant  
21 *Staphylococcus aureus* Infection. *Clin. Infect. Dis.* **46**, S350–S359 (2008).
- 22 9. Abad, C. L., Pulia, M. S. & Safdar, N. Does the Nose Know? An Update on  
23 MRSA Decolonization Strategies. *Curr. Infect. Dis. Rep.* **15**, 455–464 (2013).
- 24 10. Thomas, C. M., Hothersall, J., Willis, C. L. & Simpson, T. J. Resistance to and  
25 synthesis of the antibiotic mupirocin. *Nat. Rev. Microbiol.* **8**, 281–289 (2010).
- 26 11. Simor, A. E. Staphylococcal decolonisation: An effective strategy for  
27 prevention of infection? *Lancet Infect. Dis.* **11**, 952–962 (2011).
- 28 12. Bertino Jr, J. S. Intranasal mupirocin for outbreaks of methicillin- resistant  
29 *Staphylococcus aureus*. *Am J Heal. Pharm* **54**, 2185–2191 (1997).
- 30 13. Antonio, M., McFerran, N. & Pallen, M. J. Mutations affecting the Rossman  
31 fold of isoleucyl-tRNA synthetase are correlated with low-level mupirocin  
32 resistance in *Staphylococcus aureus*. *Antimicrob. Agents Chemother.* **46**, 438–  
33 442 (2002).
- 34 14. Patel, J. B., Gorwitz, R. J. & Jernigan, J. A. Mupirocin Resistance. *Clin. Infect. Dis.*  
35 **49**, 935–941 (2009).
- 36 15. Udo, E. E. & Sarkhoo, E. Genetic analysis of high-level mupirocin resistance in  
37 the ST80 clone of community-associated methicillin-resistant *Staphylococcus*  
38 *aureus*. *J. Med. Microbiol.* **59**, 193–199 (2010).
- 39 16. Seah, C. *et al.* MupB, a New High-Level Mupirocin Resistance Mechanism in  
40 *Staphylococcus aureus*. *Antimicrob. Agents Chemother.* **56**, 1916–1920 (2012).
- 41 17. Hetem, D. J. & Bonten, M. J. M. Clinical relevance of mupirocin resistance in  
42 *Staphylococcus aureus*. *J. Hosp. Infect.* **85**, 249–256 (2013).
- 43 18. Hurdle, J. G., O’Neil, A. J., Mody, L., Chopra, I. & Bradley, S. F. In vivo transfer  
44 of high-level mupirocin resistance from *Staphylococcus epidermidis* to  
45 methicillin-resistant *Staphylococcus aureus* associated with failure of  
46 mupirocin prophylaxis. *J Antimicrob Chemother* **56**, 1166–1168 (2005).
- 47 19. Laabei, M. *et al.* Predicting the virulence of MRSA from its genome sequence.

- 1            *Genome Res.* **24**, 839–849 (2014).
- 2    20.    Novick, R. P. *et al.* Synthesis of staphylococcal virulence factors is controlled  
3            by a regulatory RNA molecule. **12**, 3967–3975 (1993).
- 4    21.    Lina, G. *et al.* Transmembrane topology and histidine protein kinase activity of  
5            AgrC, the agr signal receptor in *Staphylococcus aureus*. *Mol. Microbiol.* **28**,  
6            655–662 (1998).
- 7    22.    Dinges, M. M., Orwin, P. M. & Schlievert, P. M. Exotoxins of *Staphylococcus*  
8            *aureus*. *Clin. Microbiol. Rev.* **13**, 16–34 (2000).
- 9    23.    Laabei, M. *et al.* Evolutionary Trade-Offs Underlie the Multi-faceted Virulence  
10           of *Staphylococcus aureus*. *PLoS Biol.* **13**, 1–21 (2015).
- 11   24.    Purcell, S. *et al.* PLINK: A Tool Set for Whole-Genome Association and  
12           Population-Based Linkage Analyses. *Am. J. Hum. Genet.* **81**, 559–575 (2007).
- 13   25.    Lenski, R. E., Rose, M. R., Simpson, S. C. & Tadler, S. C. Long-Term  
14           Experimental Evolution in *Escherichia coli*. I. Adaptation and Divergence  
15           During 2,000 Generations. *Am. Nat.* **138**, 1315–1341 (1991).
- 16   26.    Tsuchiya, S. *et al.* Establishment and characterization of a human acute  
17           monocytic leukemia cell line (THP-1). *Int. J. Cancer* **26**, 171–176 (1980).
- 18   27.    Jensen, R. O., Winzer, K., Clarke, S. R., Chan, W. C. & Williams, P. Differential  
19           Recognition of *Staphylococcus aureus* Quorum-Sensing Signals Depends on  
20           Both Extracellular Loops 1 and 2 of the Transmembrane Sensor AgrC. *J. Mol.*  
21           *Biol.* **381**, 300–309 (2008).
- 22   28.    Sowell, J., Pollard, L. & Wood, T. Quantification of branched-chain amino acids  
23           in blood spots and plasma by liquid chromatography tandem mass  
24           spectrometry for the diagnosis of maple syrup urine disease. *J. Sep. Sci.* **34**,  
25           631–639 (2011).
- 26
- 27

1 **FIGURES**

2

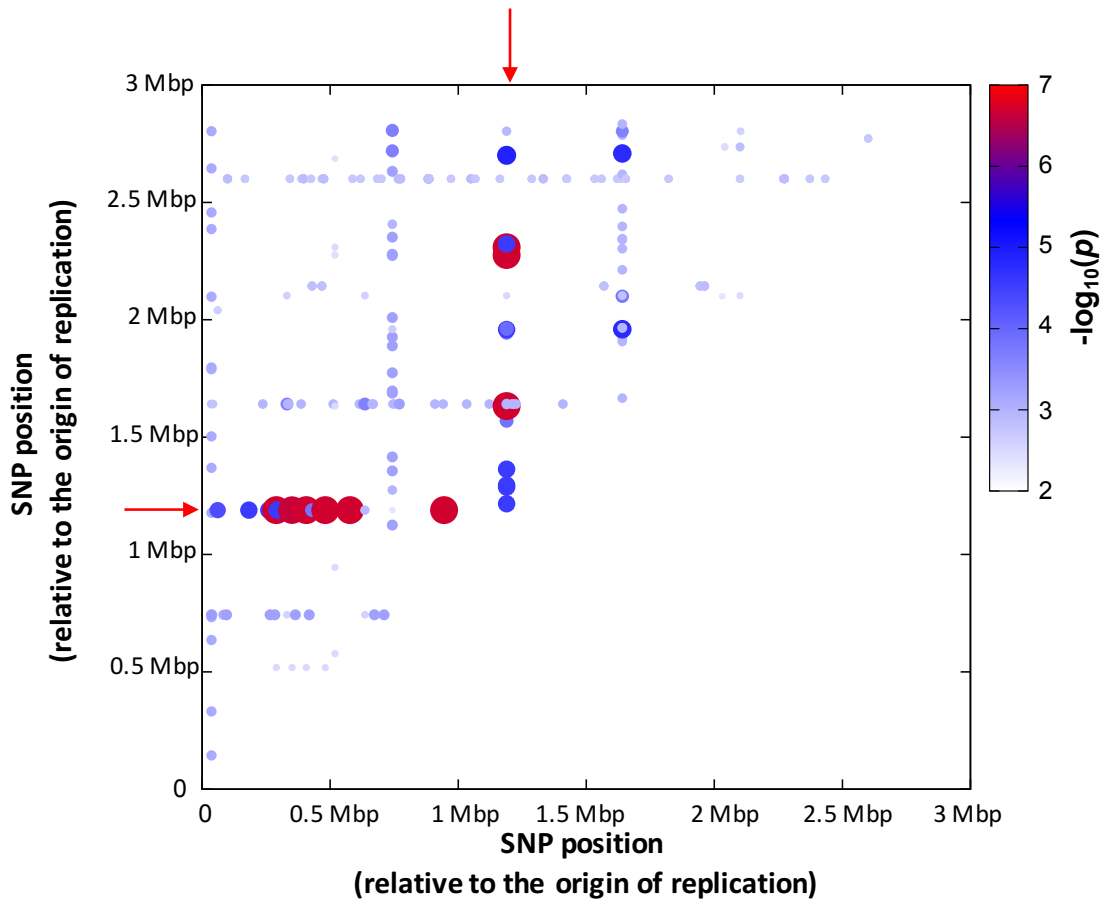

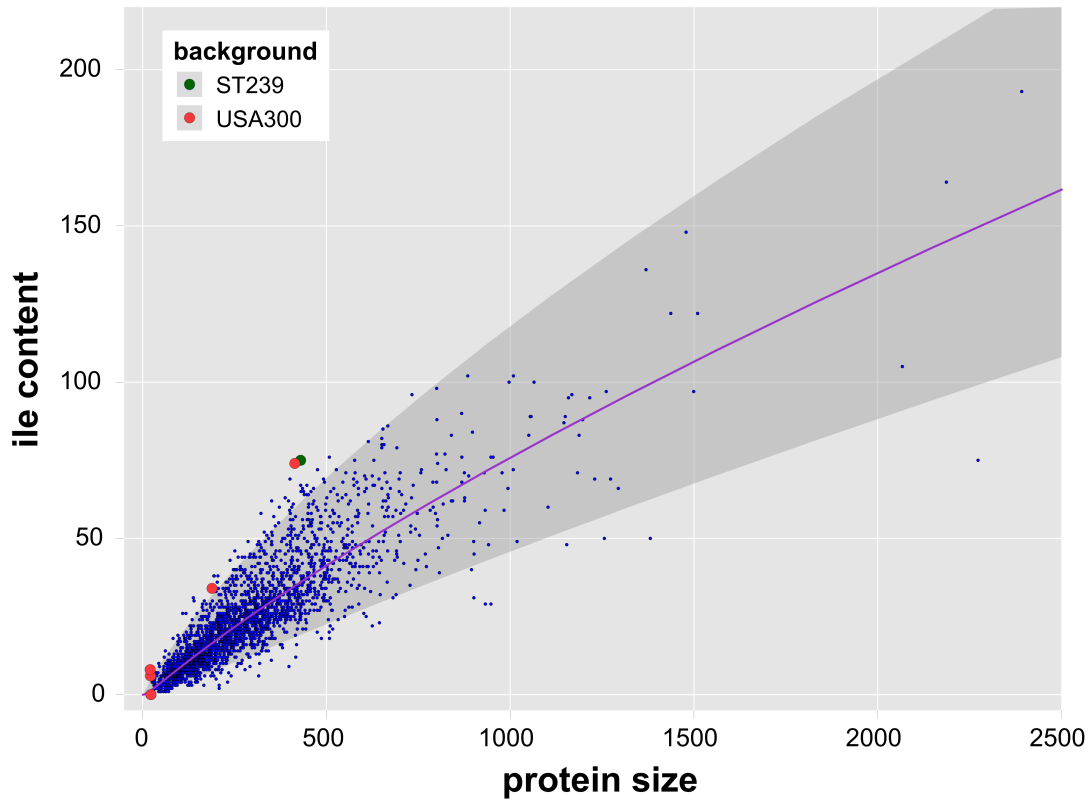

1  
2  
3  
4

5 **Fig. 2:** The Ile content of *S. aureus* proteins relative to their length. The purple line  
6 shows the regression fit after transforming the data using the Box-Cox power  
7 transformation, with the shaded red area indicating the 95% prediction interval. The  
8 AgrC, AgrB and the PSMs with high ile content are indicated in green and red for the  
9 proteins encoded on the ST239 and USA300 background respectively.

1  
2

A: Native *S. aureus* with functioning Agr system.

B: Mutant *S. aureus* constructed to quantify *agrC* transcription and translation.

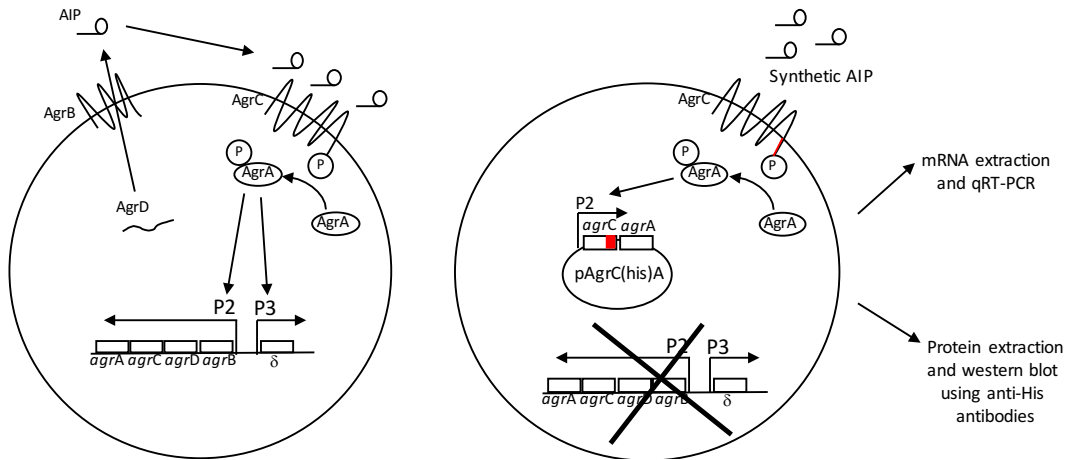

3  
4  
5  
6  
7  
8  
9  
10  
11  
12

**Fig. 3:** Strain construction to facilitate the quantification of *agrC* transcription and translation. A: Depicts a native functioning Agr system. B: Depicts the mutant that was constructed and illustrates which elements of the Agr system were replaced to facilitate and control *agrC* transcription and translation. The his-tag fused to 3' end of *agrC* is depicted in red and is used to quantify AgrC protein using anti-his tag antibodies. The mupirocin sensitive version of this has been named MY42 and the mupirocin resistant version MY43.

1

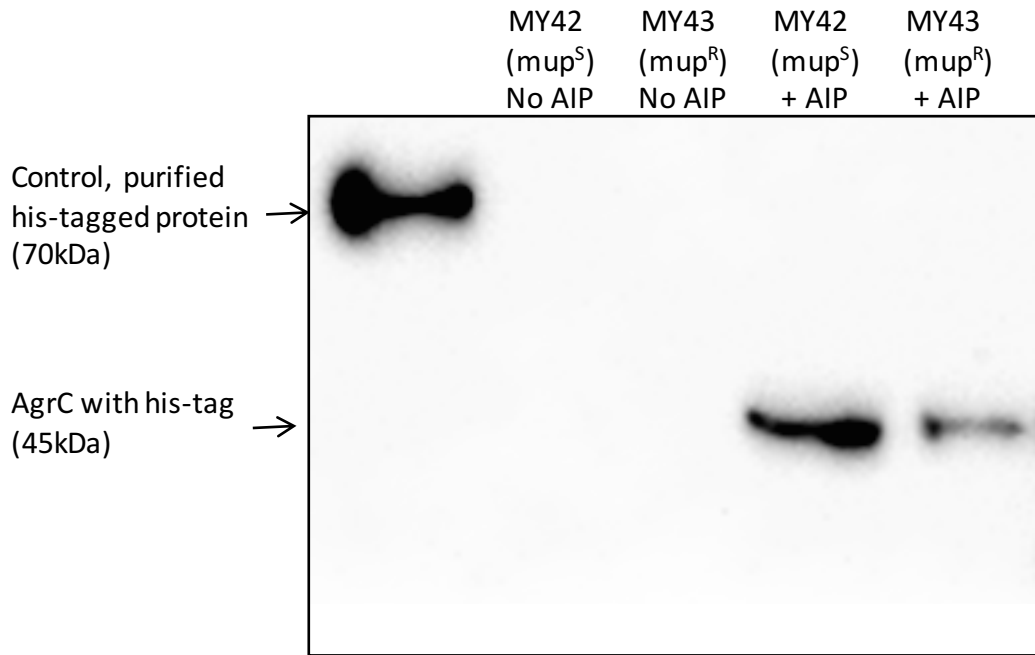

2

3

4

5

6

7

8

9

**Fig. 4:** Mupirocin resistance affects the translation of AgrC. Using the constructed strains MY42 and MY43 we compared the relative translation of AgrC using HisProbe HRP Conjugate (Thermo) to a 6X his-tag fused to the 5' end of the gene. The western blot demonstrates the effect of AIP induction of AgrC expression and the difference in translation of the AgrC protein when the strain is mupirocin resistant.

10

11

12

13

14

15

16

17

18

19

20

21

22

23

1

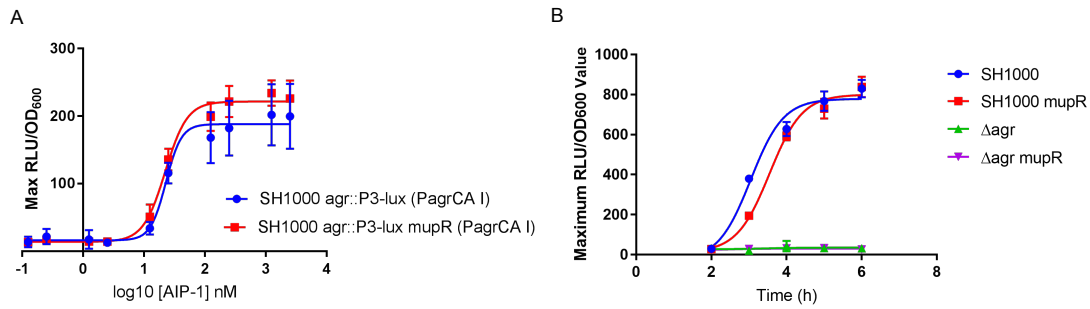

2

3

4

5

6

7 **Fig. 5:** Effect of mupirocin resistance on the response to exogenous AIP, and on AIP  
8 production as a function of growth. **A:** The half maximal effective concentration  
9 (EC<sub>50</sub>) of AIP required to activate the Agr system was quantified for both the  
10 mupirocin resistant and sensitive *S. aureus* strains, where no significant effect of  
11 mupirocin resistance was observed. **B:** The relative concentration of AIP in the  
12 culture supernatant was quantified following growth for 6h for both the mupirocin  
13 resistant and sensitive strains. No effect of mupirocin resistance on this aspect of Agr  
14 activity was observed under these conditions.

15

16



1  
2

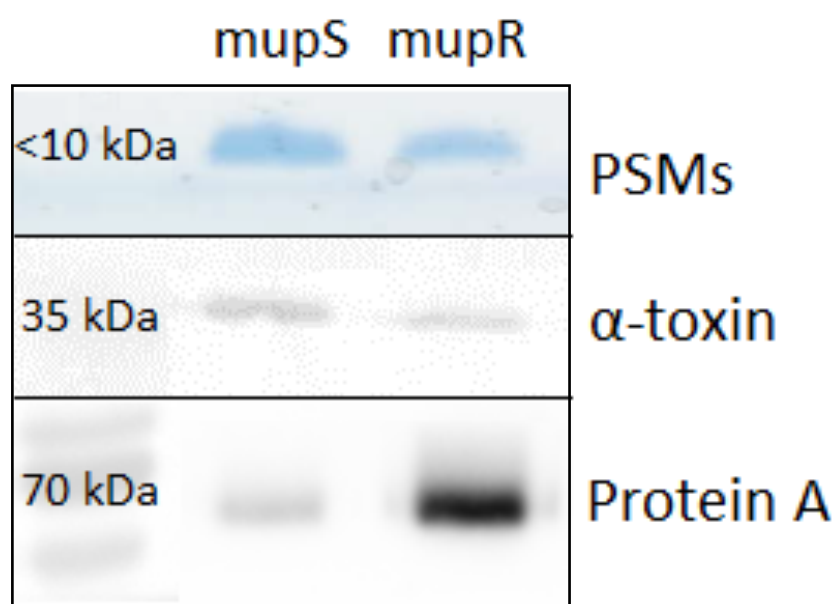

3  
4  
5  
6  
7  
8  
9  
10

**Fig. 6:** Mupirocin resistance affects the expression of PSMs, alpha toxin and Protein A by *S. aureus* following growth in nutrient rich media. The mup<sup>R</sup> and mup<sup>S</sup> strains were grown in TSB for 18hrs. The PSMs were harvested by butanol extraction and run on an SDS-PAGE gel. Alpha toxin and protein A were western blotting using appropriate antibodies.

1 **TABLES**

2 **Table 1:** Loci in both the ST239 and USA300 collections identified by GWAS as  
 3 interacting epistatically with the mutation in *ileS*.

4 **ST239**

| <b>SNP position</b> | <b>Locus Tag/Gene Name</b>                       | <b>Putative function</b>                                                              |
|---------------------|--------------------------------------------------|---------------------------------------------------------------------------------------|
| 1360889             | SAWT20_12700                                     | Putative DNA translocase (FtsK/SpoIIIE family protein)                                |
| 1474673             | SATW20_13760                                     | Haloacid dehalogenase-like hydrolase superfamily protein                              |
| 1536348             | <i>ebh</i>                                       | Very large surface anchored protein                                                   |
| 1557020             | <i>ebh</i>                                       | Very large surface anchored protein                                                   |
| 1557275             | <i>ebh</i>                                       | Very large surface anchored protein                                                   |
| 1579791             | <i>pbp2</i>                                      | Penicillin-binding protein 2                                                          |
| 1937314             | SATW20_17780                                     | Putative exported protein                                                             |
| 1941832             | SATW20_17820                                     | Conserved hypothetical protein                                                        |
| 1975607             | SATW20_18180                                     | Lantibiotic biosynthesis protein                                                      |
| 2033565             | SATW20_18600                                     | ABC transporter ATP-binding protein                                                   |
| 2075672             | <i>pcrB</i>                                      | <i>pcrB</i> family protein                                                            |
| 2128192             | SATW20_19530                                     | $\beta$ converting phage protein                                                      |
| 2312226             | SATW20_21880                                     | ABC transporter ATP-binding protein                                                   |
| 2409540             | SATW20_22770                                     | putative non-haem iron-containing ferritin                                            |
| 2432219             | <i>fmtB</i>                                      | LPXTG surface-anchored protein                                                        |
| 2450342             | Intergenic between SATW20_r160 AND SATW20_23010  | 16S rRNA AND conserved hypothetical protein                                           |
| 2548323             | <i>modC</i>                                      | Putative molybdenum transport ATP-binding protein                                     |
| 2578126             | SATW20_24400                                     | Putative bifunctional protein                                                         |
| 2639747             | <i>lldP2</i>                                     | Putative L-lactate permease 2                                                         |
| 2657438             | Intergenic between SATW20_25130 AND <i>gltT</i>  | Putative exported protein AND putative proton/sodium-glutamate symport protein        |
| 2674904             | <i>nasD</i>                                      | Nitrite reductase large subunit                                                       |
| 2759775             | SATW20_26050                                     | Putative short chain dehydrogenase                                                    |
| 2790429             | SATW20_26280                                     | Conserved hypothetical protein                                                        |
| 2810368             | Intergenic between SATW20_26460 AND SATW20_26470 | Putative haloacid dehalogenase-like hydrolase AND ABC transporter ATP-binding protein |
| 2970902             | SATW20_27860                                     | Hypothetical protein                                                                  |
| 3002241             | <i>hisH</i>                                      | Putative amidotransferase                                                             |
| 3002845             | <i>hisB</i>                                      | Putative imidazoleglycerol-                                                           |

1

|                     |                                                    | phosphatedehydratase                                                                                |
|---------------------|----------------------------------------------------|-----------------------------------------------------------------------------------------------------|
| <b>USA300</b>       |                                                    |                                                                                                     |
| <b>SNP position</b> | <b>Locus Tag/Gene Name</b>                         | <b>Putative function</b>                                                                            |
| 61025               | SAUSA300_0050                                      | Hypothetical protein                                                                                |
| 182746              | <i>cap5I</i>                                       | Capsular polysaccharide biosynthesis protein                                                        |
| 260357              | Intergenic between SAUSA300_0219 AND <i>pflB</i>   | Putative iron compound A C transporter, iron compound-binding protein AND formate acetyltransferase |
| 270510              | SAUSA300_0226                                      | 3-hydroxyacyl-CoA dehydrogenase                                                                     |
| 289635              | SAUSA300_0239                                      | PTS system, fructose-specific enzyme II, BC component                                               |
| 292738              | <i>gutB</i>                                        | Sorbitol dehydrogenase                                                                              |
| 331125              | SAUSA300_0279                                      | Putative membrane protein                                                                           |
| 351171              | SAUSA300_0300                                      | Conserved hypothetical protein                                                                      |
| 406847              | SAUSA300_0355                                      | Acetyl-CoA acetyltransferase                                                                        |
| 429073              | <i>ahpF</i>                                        | Alkyl hydroperoxide reductase, subunit F                                                            |
| 467549              | SAUSA300_0414                                      | Staphylococcal tandem lipoprotein                                                                   |
| 480640              | SAUSA300_0426                                      | Conserved hypothetical protein                                                                      |
| 577067              | <i>cysE</i>                                        | Serine acetyltransferase                                                                            |
| 635299              | <i>vraB</i>                                        | Acetyl-CoA c-acetyltransferase                                                                      |
| 742782              | Intergenic between SAUSA300_0669 AND SAUSA300_0670 | Undecaprenol kinase AND ABC transporter, ATP-binding protein, MsbA family                           |
| 944770              | Intergenic between <i>argG</i> AND <i>pgi</i>      | Argininosuccinate synthase AND glucose-6-phosphate isomerase                                        |
| 1215913             | <i>sun</i>                                         | Ribosomal RNA small subunit methyltransferase B                                                     |
| 1286986             | <i>ftsK</i>                                        | DNA translocase FtsK                                                                                |
| 1295497             | <i>cinA</i>                                        | Competence/damage-inducible protein cinA                                                            |
| 1363207             | <i>sbcC</i>                                        | Exonuclease SbcC                                                                                    |
| 1568945             | SAUSA300_1403                                      | phiSLT ORF412-like protein, portal protein                                                          |
| 1632033             | Intergenic between SAUSA300_1477 AND SAUSA300_1478 | Transposase AND lipoprotein                                                                         |
| 1640549             | SAUSA300_1485                                      | Conserved hypothetical protein                                                                      |
| 1944161             | Intergenic between <i>spIA</i> AND SAUSA300_1759   | Serine protease AND hypothetical protein                                                            |
| 1961241             | SAUSA300_1778                                      | tRNA-asp                                                                                            |
| 2102731             | SAUSA300_1934                                      | phi77 ORF020-like protein, phage major tail protein                                                 |

|         |               |                                                 |
|---------|---------------|-------------------------------------------------|
| 2275521 | SAUSA300_2106 | Putative transcriptional repressor              |
| 2276564 | <i>mtIA</i>   | PTS system, mannitol specific IIA component     |
| 2308707 | SAUSA300_2135 | Iron compound ABC transporter, permease protein |
| 2322700 | SAUSA300_2146 | Alcohol dehydrogenase, zinc-containing          |
| 2685939 | SAUSA300_2486 | Putative ATP-dependent Clp proteinase           |
| 2700617 | SAUSA300_2497 | Aminotransferase, class I                       |
| 2803422 | SAUSA300_2583 | Putative glycosyl transferase                   |

1  
2

3 **Table 2:** The effect of mupirocin resistance on the relative transcription and  
4 translation of AgrC. Transcription was measured by qRT-PCR and is presented  
5 relative to *gyrB* transcription. Translation was measured by western blotting using  
6 anti-hiss tag antibodies and densitometry used to quantify the amount of protein  
7 present. This was performed in triplicate and a representative western is present in  
8 figure 3.

|                      | MY42 (mup <sup>S</sup> ) | MY43 (mup <sup>R</sup> ) | Ratio       | P value      |
|----------------------|--------------------------|--------------------------|-------------|--------------|
| <b>Transcription</b> | <b>0.95</b>              | <b>0.98</b>              | <b>0.97</b> | <b>0.17</b>  |
| <b>Translation</b>   | <b>4771</b>              | <b>2305</b>              | <b>2.07</b> | <b>0.006</b> |

9  
10  
11

12 **Table 3:** Strains used in this study.

| Strain | Relevant genotypic information | Mupirocin resistance |
|--------|--------------------------------|----------------------|
| SH1000 | wild-type lab strain           | mup <sup>S</sup>     |
| MY40   | mupirocin resistant SH1000     | mup <sup>R</sup>     |
| MY18   | SH1000 $\Delta$ agr            | mup <sup>S</sup>     |
| MY41   | mupirocin resistant MY18       | mup <sup>R</sup>     |
| MY42   | MY18 + pAgrC(his)A             | mup <sup>S</sup>     |
| MY43   | MY41 + pAgrC(his)A             | mup <sup>R</sup>     |

13
